# Supplementary material for: Genomic and Geographic Context for the Evolution of High-Risk Carbapenem-Resistant Enterobacter cloacae Complex Clones ST171 and ST78
Source: PubMed Central journal article supplement (PMC5974468; doi:10.1128/mbio.00542-18), 2018-05-29

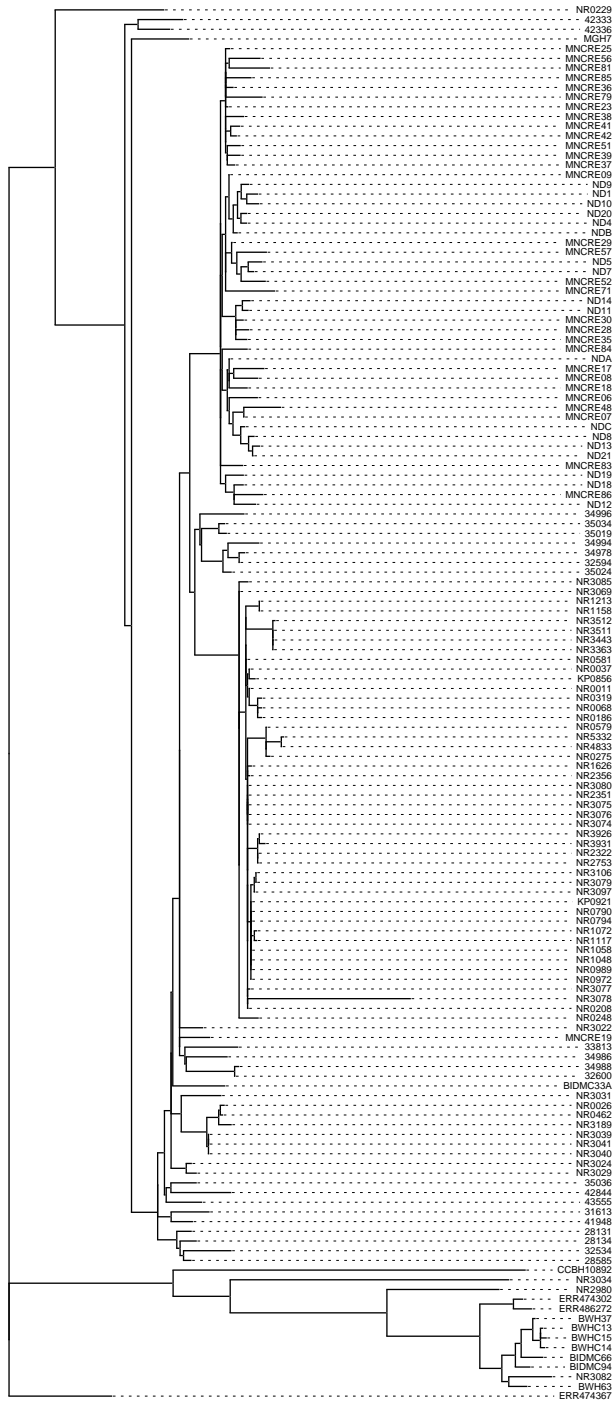

NR0229  
 - 42333  
 - 42336  
 MNCRE7  
 MNCRE29  
 MNCRE56  
 MNCRE61  
 MNCRE85  
 MNCRE96  
 MNCRE79  
 MNCRE23  
 MNCRE38  
 MNCRE41  
 MNCRE42  
 MNCRE51  
 MNCRE39  
 MNCRE57  
 MNCRE09  
 ND9  
 ND1  
 ND10  
 ND20  
 ND4  
 NDB  
 MNCRE29  
 MNCRE57  
 ND5  
 ND7  
 MNCRE52  
 MNCRE71  
 ND14  
 ND11  
 MNCRE30  
 MNCRE28  
 MNCRE55  
 MNCRE84  
 NDA  
 MNCRE17  
 MNCRE08  
 MNCRE18  
 MNCRE06  
 MNCRE48  
 MNCRE07  
 NDC  
 ND8  
 ND13  
 ND21  
 MNCRE83  
 ND19  
 ND18  
 MNCRE86  
 ND12  
 34986  
 35034  
 35019  
 34994  
 34978  
 32594  
 35024  
 NR3085  
 NR3089  
 NR1213  
 NR1158  
 NR3512  
 NR3511  
 NR3443  
 NR3363  
 NR0581  
 NR0037  
 KP0856  
 NR0011  
 NR0319  
 NR0068  
 NR0186  
 NR0579  
 NR5322  
 NR4532  
 NR0275  
 NR1626  
 NR2356  
 NR3080  
 NR2351  
 NR3075  
 NR3076  
 NR3074  
 NR3926  
 NR3931  
 NR2322  
 NR2753  
 NR3106  
 NR3079  
 NR3097  
 KP0921  
 NR0750  
 NR0794  
 NR1072  
 NR1117  
 NR1058  
 NR1048  
 NR0989  
 NR0972  
 NR3077  
 NR3078  
 NR0208  
 NR0248  
 NR3022  
 MNCRE19  
 33813  
 34986  
 34988  
 32600  
 BIDMC33A  
 NR0331  
 NR0026  
 NR0462  
 NR3189  
 NR3039  
 NR3041  
 NR3040  
 NR3024  
 NR3029  
 35036  
 42944  
 43555  
 31513  
 41948  
 28131  
 28134  
 32534  
 26585  
 CCBH10892  
 NR3034  
 NR2980  
 ERR474302  
 ERR46272  
 BWH57  
 BWHC13  
 BWHC15  
 BWHC14  
 BIDMC66  
 BIDMC34  
 NR3082  
 BWH63  
 ERR474367

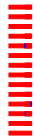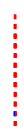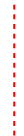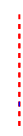

Supplement: mbo003183911sf1.pdf [file mbo003183911sf1.pdf]
