# Supplementary material for: Genomic and Geographic Context for the Evolution of High-Risk Carbapenem-Resistant Enterobacter cloacae Complex Clones ST171 and ST78
Source: PubMed Central journal article supplement (PMC5974468; doi:10.1128/mbio.00542-18), 2018-05-29

# Transformation efficiencies

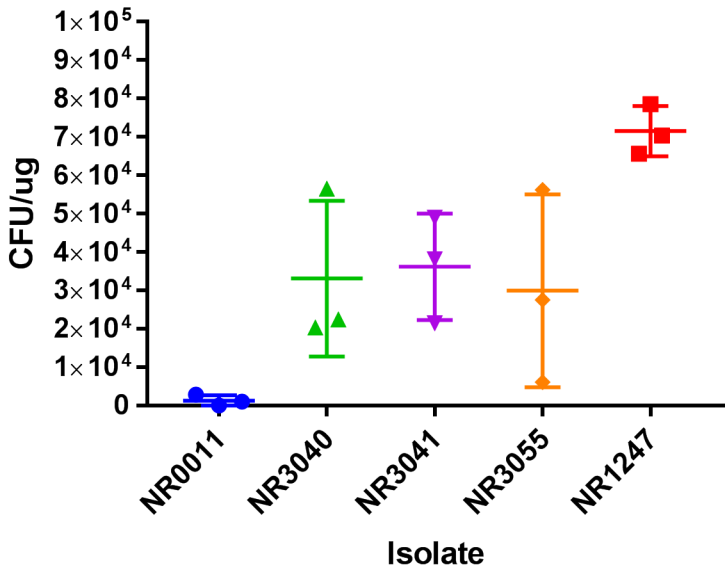

Supplement: mbo003183911sf3.pdf [file mbo003183911sf3.pdf]
